# Supplementary material for: Ketamine for the acute treatment of severe suicidal ideation: double blind, randomised placebo controlled trial
Source: PubMed Central journal article supplement — BMJ. 2022 Feb 2;376:e067194. doi: 10.1136/bmj-2021-067194 (PMC8808464; doi:10.1136/bmj-2021-067194), 2022-02-02
Supplement: abbm067194.ww.pdf [file abbm067194.ww.pdf]

**Table S1. Changes to the original protocol.**

| STEPS                                                                                                                                                                                                                                                                                                                                                                                                                                                                                       | DATE       |
|---------------------------------------------------------------------------------------------------------------------------------------------------------------------------------------------------------------------------------------------------------------------------------------------------------------------------------------------------------------------------------------------------------------------------------------------------------------------------------------------|------------|
| REB approval                                                                                                                                                                                                                                                                                                                                                                                                                                                                                | 2014/07/18 |
| Minor changes to protocol: <ul style="list-style-type: none"> <li>- Dr Fabienne CYPRIEN is not an investigator of this study anymore.</li> <li>- Add Dr Aurélie CHOPIN as an investigator.</li> <li>- Clarification in the protocol that the self-rated Beck SSI is fulfilled in addition to the clinician-rated Beck SSI.</li> <li>- Stop using QIDS-SR16 as it is redundant for the assessment of depression with the IDS-30 and increase the duration of patient's assessment</li> </ul> | 2015/07/01 |
| Minor changes to protocol: <ul style="list-style-type: none"> <li>- Add Dr Fabrice JOLLANT as an investigator</li> <li>- Modify the professional location for Prof. Franck BELLIVIER</li> <li>- Modify the way the biobank is constituted to improve the quality of samples:               <ul style="list-style-type: none"> <li>+ modify the order of blood samples</li> <li>+ modify the tubes used for samples</li> <li>+ Modify the location of sample storage</li> </ul> </li> </ul>  | 2015/11/04 |
| Minor changes to protocol: <ul style="list-style-type: none"> <li>- Increase the duration of recruitment by 18 months to reach the targeted sample size</li> </ul>                                                                                                                                                                                                                                                                                                                          | 2016/04/13 |
| Minor changes to protocol: <ul style="list-style-type: none"> <li>- Increase the duration of recruitment by 12 months to reach the targeted sample size</li> <li>- Add CMME in Paris as a recruitment center</li> <li>- Several questionnaires are stopped at endpoints 40min, 120min or 4h to reduce the burden of these assessments</li> </ul>                                                                                                                                            | 2017/09/13 |
| Minor changes to protocol: <ul style="list-style-type: none"> <li>- Increase the duration of recruitment by 6 months to reach the targeted sample size</li> </ul>                                                                                                                                                                                                                                                                                                                           | 2018/07/04 |

### Table S2. Sample size calculation

For each diagnostic category, 26 subjects per arm would make it possible to demonstrate an absolute difference of approximately 45% in the rate of resolution of suicidal ideation at 72 hours (15% in the placebo arm versus approximately 60% in the Ketamine arm), with a power of 85% and an overall two-sided alpha risk of 5% (Bonferoni's correction was applied for the performance of 3 ( $\alpha=0.017$ ) or 4 ( $\alpha=0.013$ ) tests. So the total number of subjects to include is 156. The calculation was carried out with nQuery software version 8.7.2.0

### Compute Proportion for Two-Sample Chi-Squared Test

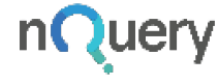

| Columns 1-5                       | 1     | 2     | 3 | 4 | 5 |
|-----------------------------------|-------|-------|---|---|---|
| Test Significance Level, $\alpha$ | 0.013 | 0.017 |   |   |   |
| 1 or 2 Sided Test?                | 2     | 2     | 2 | 2 | 2 |
| Smaller Proportion, $\pi_1$       | 0.150 | 0.150 |   |   |   |
| Larger Proportion, $\pi_2$        | 0.609 | 0.594 |   |   |   |
| Power (%)                         | 85    | 85    |   |   |   |
| Sample Size per Group, n          | 26    | 26    |   |   |   |

**Table S3: Baseline characteristics of the bipolar disorder group**

|                                           | Placebo (n=26)     | Ketamine (n=26)    |
|-------------------------------------------|--------------------|--------------------|
| Sex                                       |                    |                    |
| Male                                      | 8 (30.8%)          | 6 (23.1%)          |
| Female                                    | 18 (69.2%)         | 20 (76.9%)         |
| Age (years)                               | 46 [18-71]         | 39.5 [22-75]       |
| Height (cm)                               | 166.5 (160-172)    | 166 (164-170)      |
| BMI (kg/m <sup>2</sup> )                  | 25.7 (22.6 - 27.5) | 23.1 (21.2 - 27.9) |
| SSI suicidal ideas score, clinician-rated | 20 (18 - 24)       | 20.5 (16.0 - 26.5) |
| SSI suicidal ideas score, patient-rated   | 17.5 (14.8 - 19.0) | 16.5 (12.0 - 18.0) |
| CSSRS suicidal ideation intensity score   | 22.0 [18.5 - 24.0] | 20.0 [16.3 - 23.0] |
| MINI - Severe suicidal ideas              | 24 (92.3%)         | 25 (96.2%)         |
| PPP-VAS physical pain score               | 2.1 (0.0 - 4.9)    | 2.0 (0.0 - 5.0)    |
| PPP-VAS psychological pain score          | 8.1 (6.8 - 8.8)    | 6.8 (6.0 - 8.4)    |
| BHS hopelessness score                    | 15.0 (13.0 - 16.3) | 15 (12 - 17)       |
| IDS-C30 depression score                  | 39 (35 - 45)       | 39.0 (31.8 - 48)   |
| Major depressive episode - current        | 16 (61.5%)         | 15 (57.7%)         |
| Dysthymia - current                       | 0 (0%)             | 1 (3.8%)           |
| Manic episodes - past                     | 17 (65.4%)         | 14 (53.8%)         |
| Hypomanic episodes - past                 | 10 (38.5%)         | 11 (42.3%)         |
| Panic disorder - current                  | 1 (3.8%)           | 6 (23.1%)          |
| Agoraphobia - current                     | 4 (15.4%)          | 5 (19.2%)          |
| Social phobia - current                   | 4 (15.4%)          | 6 (23.1%)          |
| Generalized anxiety - current             | 3 (11.5%)          | 3 (11.5%)          |
| Obsessive-compulsive disorder - current   | 0 (0%)             | 1 (3.8%)           |
| Post-traumatic stress disorder - current  | 2 (7.7%)           | 2 (7.7%)           |
| Alcohol dependence - past                 | 2 (7.7%)           | 3 (11.5%)          |
| Substance dependence - past               | 2 (7.7%)           | 2 (7.7%)           |
| Anorexia nervosa - current                | 0 (0%)             | 0 (0%)             |
| Bulimia nervosa - current                 | 2 (7.7%)           | 2 (7.7%)           |
| Previous history of suicide attempt       | 26 (100%)          | 23 (92%)           |
| Medication at Day 3 :                     |                    |                    |
| Lithium                                   | 4 (15.4 %)         | 1 (3.8 %)          |
| Antipsychotics                            | 16 (61.5 %)        | 12 (46.2 %)        |
| Antiepileptics                            | 11 (42.3 %)        | 4 (15.4 %)         |
| Antidepressants                           | 12 (46.2 %)        | 8 (30.8 %)         |
| Anxiolytics                               | 12 (46.2 %)        | 14 (53.8 %)        |
| Hypnotics                                 | 3 (11.5 %)         | 2 (7.7 %)          |
| Other psychotropic medication             | 1 (3.8 %)          | 1 (3.8 %)          |
| Antalgic                                  | 1 (3.8 %)          | 5 (19.2 %)         |
| Other medication                          | 7 (26.9 %)         | 9 (34.6 %)         |

Data are n (%), median (IQR) or median [range], mean (SD), or n/N (%). BMI=body-mass index. SSI=Beck scale for suicidal ideation. CSSRS =Columbia severity suicide rating scale. MINI: 7<sup>th</sup> version (7.0.2) of the Mini International Neuropsychiatric Interview. PPP-VAS=Physical and psychological pain – visual analog scale. BHS: Beck hopelessness scale. IDS=30-item inventory for depressive symptomatology, clinician-rated version.

**Table S4: Baseline characteristics of the depressive disorder group**

|                                           | <b>Placebo (n=30)</b> | <b>Ketamine (n=26)</b> |
|-------------------------------------------|-----------------------|------------------------|
| Sex                                       |                       |                        |
| Male                                      | 17 (56.7%)            | 7 (26.9%)              |
| Female                                    | 13 (43.3%)            | 19 (73.1%)             |
| Age (years)                               | 40.5 [18 - 76]        | 40 [19 - 67]           |
| Height (cm)                               | 170.0 (163.3 – 177.0) | 165.0 (160.0 – 170.8)  |
| BMI (kg/m <sup>2</sup> )                  | 22.2 (19.7 - 24.9)    | 23.5 (20.0 - 29.1)     |
| SSI suicidal ideas score, clinician-rated | 16.5 (13.3 - 22.0)    | 23.0 (19.5 - 27.5)     |
| SSI suicidal ideas score, patient-rated   | 15 (12 - 19)          | 17.0 (15.5 - 21.3)     |
| CSSRS suicidal ideation intensity score   | 18 [12 - 24]          | 20 [11 - 25]           |
| MINI - Severe suicidal ideas              | 23 (79.3%)            | 26 (100%)              |
| PPP-VAS physical pain score               | 1.90 (0.03 - 5.00)    | 2.55 (0.00 - 6.85)     |
| PPP-VAS psychological pain score          | 7.1 (6.0 - 8.2)       | 8.0 (6.4 - 9.0)        |
| BHS hopelessness score                    | 14.0 (11.5 - 17.5)    | 17 (14 - 18)           |
| IDS-C30 depression score                  | 37.5 (33.3 - 48.0)    | 46.5 (37.0 - 51.0)     |
| Major depressive episode - current        | 22 (73.3%)            | 17 (65.4%)             |
| Dysthymia - current                       | 3 (10%)               | 4 (15.4%)              |
| Manic episodes - past                     | 0 (0%)                | 0 (0%)                 |
| Hypomanic episodes - past                 | 0 (0%)                | 0 (0%)                 |
| Panic disorder - current                  | 5 (17.2%)             | 4 (15.4%)              |
| Agoraphobia - current                     | 6 (20.7%)             | 2 (7.7%)               |
| Social phobia - current                   | 8 (27.6%)             | 4 (15.4%)              |
| Generalized anxiety - current             | 9 (30%)               | 8 (30.8%)              |
| Obsessive-compulsive disorder - current   | 1 (3.4%)              | 2 (7.7%)               |
| Post-traumatic stress disorder - current  | 5 (16.7%)             | 5 (19.2%)              |
| Alcohol dependence - past                 | 4 (13.3%)             | 2 (7.7%)               |
| Substance dependence - past               | 4 (13.3%)             | 2 (7.7%)               |
| Anorexia nervosa - current                | 0 (0%)                | 0 (0%)                 |
| Bulimia nervosa - current                 | 1 (3.3%)              | 2 (7.7%)               |
| Previous history of suicide attempt       | 20 (69.0%)            | 24 (92.3%)             |
| Medication at Day 3 :                     |                       |                        |
| Lithium                                   | 0 (0 %)               | 1 (3.8 %)              |
| Antipsychotics                            | 13 (43.3 %)           | 8 (30.8 %)             |
| Antiepileptics                            | 0 (0 %)               | 0 (0 %)                |
| Antidepressants                           | 12 (40 %)             | 5 (19.2 %)             |
| Anxiolytics                               | 18 (60 %)             | 14 (53.8 %)            |
| Hypnotics                                 | 3 (10 %)              | 1 (3.8 %)              |
| Other psychotropic medication             | 2 (6.7 %)             | 3 (11.5 %)             |
| Antalgic                                  | 0 (0 %)               | 2 (7.7 %)              |
| Other medication                          | 10 (33.3 %)           | 9 (34.6 %)             |

Data are n (%), median (IQR) or median [range], mean (SD), or n/N (%). BMI=body-mass index. SSI=Beck scale for suicidal ideation. CSSRS =Columbia severity suicide rating scale. MINI: 7<sup>th</sup> version (7.0.2) of the Mini International Neuropsychiatric Interview. PPP-VAS=Physical and psychological pain – visual analog scale. BHS: Beck hopelessness scale. IDS=30-item inventory for depressive symptomatology, clinician-rated version.

**Table S5: Baseline characteristics of the other diagnoses group**

|                                           | Placebo (n=27)        | Ketamine (n=21)    |
|-------------------------------------------|-----------------------|--------------------|
| Sex                                       |                       |                    |
| Male                                      | 6 (22.2%)             | 6 (28.6%)          |
| Female                                    | 21 (77.8%)            | 15 (71.4%)         |
| Age (years)                               | 38.0 [22.0 - 50.5]    | 30 [26 - 46]       |
| Height (cm)                               | 163.0 (159.0 - 170.5) | 165 (158 - 170)    |
| BMI (kg/m <sup>2</sup> )                  | 26.2 (21.3 - 30.4)    | 27.6 (21.8 - 34.0) |
| SSI suicidal ideas score, clinician-rated | 23.0 (16.5 - 26.5)    | 20 (16 - 26)       |
| SSI suicidal ideas score, patient-rated   | 19.0 (14.3 - 23.0)    | 16.5 (14.0 - 19.3) |
| CSSRS suicidal ideation intensity score   | 18 [12 - 24]          | 20 [13 - 25]       |
| MINI - Severe suicidal ideas              | 24 (88.9%)            | 20 (95.2%)         |
| PPP-VAS physical pain score               | 1.6 (0.0 - 4.0)       | 1.5 (0.0 - 4.5)    |
| PPP-VAS psychological pain score          | 9.1 (7.9 - 10.0)      | 8 (7 - 9)          |
| BHS hopelessness score                    | 16.0 (11.5 - 17.0)    | 16.0 (13.8 - 17.0) |
| IDS-C30 depression score                  | 33 (28 - 40)          | 31 (23 - 37)       |
| Major depressive episode - current        | 0 (0%)                | 0 (0%)             |
| Dysthymia - current                       | 2 (7.4%)              | 3 (14.3%)          |
| Manic episodes - past                     | 0 (0%)                | 0 (0%)             |
| Hypomanic episodes - past                 | 0 (0%)                | 0 (0%)             |
| Panic disorder - current                  | 2 (7.4%)              | 1 (4.8%)           |
| Agoraphobia - current                     | 2 (7.4%)              | 4 (19.0%)          |
| Social phobia - current                   | 5 (18.5%)             | 3 (14.3%)          |
| Generalized anxiety - current             | 4 (14.8%)             | 3 (14.3%)          |
| Obsessive-compulsive disorder - current   | 0 (0%)                | 0 (0%)             |
| Post-traumatic stress disorder - current  | 4 (14.8%)             | 5 (23.8%)          |
| Alcohol dependence - past                 | 0 (0%)                | 1 (4.8%)           |
| Substance dependence - past               | 0 (0%)                | 0 (0%)             |
| Anorexia nervosa - current                | 1 (3.7%)              | 0 (0%)             |
| Bulimia nervosa - current                 | 2 (7.4%)              | 2 (9.5%)           |
| Previous history of suicide attempt       | 24 (88.9%)            | 20 (95.2%)         |
| Medication at Day 3 :                     |                       |                    |
| Lithium                                   | 0 (0 %)               | 0 (0 %)            |
| Antipsychotics                            | 7 (25.9 %)            | 10 (47.6 %)        |
| Antiepileptics                            | 1 (3.7 %)             | 1 (4.8 %)          |
| Antidepressants                           | 4 (14.8 %)            | 5 (23.8 %)         |
| Anxiolytics                               | 12 (44.4 %)           | 10 (47.6 %)        |
| Hypnotics                                 | 4 (14.8 %)            | 2 (9.5 %)          |
| Other psychotropic medication             | 0 (0 %)               | 1 (4.8 %)          |
| Antalgic                                  | 1 (3.7 %)             | 3 (14.3 %)         |
| Other medication                          | 9 (33.3 %)            | 5 (23.8 %)         |

Data are n (%), median (IQR) or median [range], mean (SD), or n/N (%). BMI=body-mass index. SSI=Beck scale for suicidal ideation. CSSRS =Columbia severity suicide rating scale. MINI: 7<sup>th</sup> version (7.0.2) of the Mini International Neuropsychiatric Interview. PPP-VAS=Physical and psychological pain – visual analog scale. BHS: Beck hopelessness scale. IDS=30-item inventory for depressive symptomatology, clinician-rated version.

**Table S6. Outcome of the scales used at each assessment point in each arm (P: Placebo, K: Ketamine).**

|                                                  | Baseline       |                | 40 min         |               | 120 min        |               | 4 hours             |                     | 24 hours            |                    | 48 hours      |                    | 72 hours            |              | 96 hours            |                    | 2 weeks             |                    | 4 weeks            |                   | 6 weeks           |                   |
|--------------------------------------------------|----------------|----------------|----------------|---------------|----------------|---------------|---------------------|---------------------|---------------------|--------------------|---------------|--------------------|---------------------|--------------|---------------------|--------------------|---------------------|--------------------|--------------------|-------------------|-------------------|-------------------|
| Arm                                              | P              | K              | P              | K             | P              | K             | P                   | K                   | P                   | K                  | P             | K                  | P                   | K            | P                   | K                  | P                   | K                  | P                  | K                 | P                 | K                 |
| <b>Clinician-rated SSI: median (Q1,Q3)</b>       | 20<br>(16, 24) | 22<br>(16, 26) | 14<br>(10, 21) | 7<br>(2, 14)  | 16<br>(10, 21) | 6<br>(1, 12)  | 14.0<br>(7.8, 21.2) | 5<br>(1, 12.5)      | 11.5<br>(5.3, 19.1) | 4.5<br>(0.0, 12.8) | 10<br>(4, 18) | 3 (0, 10)          | 8.0<br>(2.0, 15.5)  | 1 (0, 8)     | 7 (1, 16)           | 1 (0, 6)           | 7 (1, 16)           | 1.0<br>(0.0, 9.5)  | 4.5<br>(0.0, 13.8) | 1.0<br>(0.0, 7.5) | 1 (0, 11)         | 0.0<br>(0.0, 7.8) |
| <b>Clinician-rated SSI, score below 3: n (%)</b> | 0              | 0              | 5<br>(6.3)     | 28<br>(38.4)  | 7<br>(8.6)     | 31<br>(42.5)  | 6<br>(7.3)          | 32<br>(43.8)        | 14<br>(17.1)        | 33<br>(45.2)       | 19<br>(23.5)  | 38<br>(52.8)       | 25<br>(31.6)        | 46<br>(63.0) | 25<br>(33.8)        | 50<br>(72.5)       | 28<br>(39.4)        | 39<br>(59.1)       | 33<br>(48.5)       | 40<br>(66.7)      | 36<br>(56.3)      | 41<br>(69.5)      |
| <b>Self-rated SSI: median (Q1,Q3)</b>            | 17<br>(14, 20) | 17<br>(13, 20) | 16<br>(11, 20) | 12<br>(7, 17) | 16<br>(11, 20) | 10<br>(6, 16) | 15<br>(11, 19)      | 10.0<br>(6.0, 16.8) | 14.5<br>(9.0, 19.2) | 8.5<br>(6, 14)     | 14<br>(6, 17) | 9.0<br>(4.3, 15.0) | 11.5<br>(7.0, 16.2) | 7 (4, 12)    | 11.0<br>(8.0, 16.5) | 7.0<br>(4.0, 11.5) | 10.0<br>(6.0, 15.8) | 6.0<br>(4.0, 13.8) | 8.0<br>(5.0, 14.2) | 6 (4, 11)         | 8 (6, 15)         | 6 (4, 11)         |
| <b>CSSSR – suicidal ideation: median (Q1,Q3)</b> | 5<br>(4, 5)    | 5<br>(5, 5)    | -              | -             | -              | -             | -                   | -                   | 1 (0, 3)            | 0 (0, 2)           | 1 (0, 3)      | 0 (0, 2)           | 0 (0, 3)            | 0 (0, 1)     | 1 (0, 3)            | 0 (0, 0)           | 1 (0, 3)            | 0 (0, 2)           | 1 (0, 3)           | 0 (0, 3)          | 0.5<br>(0.0, 2.8) | 0 (0, 2)          |
| <b>CSSSR – suicidal ideation (yes/no): n (%)</b> | 83<br>(100)    | 73<br>(100)    | -              | -             | -              | -             | -                   | -                   | 51<br>(65.2)        | 35<br>(47.9)       | 45<br>(55.6)  | 30<br>(41.7)       | 38<br>(48.1)        | 23<br>(31.9) | 40<br>(52.6)        | 17<br>(24.3)       | 42<br>(59.2)        | 31<br>(46.3)       | 40 (58)            | 26<br>(43.3)      | 33 (50)           | 24<br>(40)        |
| <b>CSSSR – intensity of</b>                      | 18.9           | 19.4           | -              | -             | -              | -             | -                   | -                   | 15.4<br>(3.7)       | 15.9               | 15.5<br>(4.0) | 14.9               | 16.0<br>(3.7)       | 15.5         | 15.2<br>(3.2)       | 15.4               | 14.7<br>(3.4)       | 13.5               | 14.1               | 13.8              | 13.5              | 13.2              |

|                                                       |                 |                   |                 |                 |                 |                 |                 |                 |                 |                  |                 |                 |              |                 |                 |                 |                 |                  |                  |                 |                 |                 |
|-------------------------------------------------------|-----------------|-------------------|-----------------|-----------------|-----------------|-----------------|-----------------|-----------------|-----------------|------------------|-----------------|-----------------|--------------|-----------------|-----------------|-----------------|-----------------|------------------|------------------|-----------------|-----------------|-----------------|
| <b>suicidal ideation: mean (SD)</b>                   | (3.9 )          | (3.8 )            |                 |                 |                 |                 |                 |                 | )               | (3.8)            | )               | (4.1)           | )            | (4.4)           | )               | (4.0)           | )               | (3.9)            | (4.0)            | (4.5)           | (3.8)           | (4.6)           |
| <b>PPP-VAS, current physical pain: median (Q1,Q3)</b> | 2 (0, 5)        | 1.9 (0, 5.3)      | 0.7 (0, 4.4)    | 0.2 (0, 4.3)    | 0.9 (0, 4.4)    | 0.2 (0, 2.2)    | 1.4 (0, 4.9)    | 0.1 (0, 2.6)    | 1.0 (0, 4.2)    | 0.2 (0, 3.3)     | 0.5 (0, 3.0)    | 0.1 (0, 4.0)    | 0.5 (0, 3.5) | 0.1 (0, 3.0)    | 0.9 (0, 2.8)    | 0.1 (0, 2.6)    | 1.0 (0, 3.0)    | 0.1 (0, 2.2)     | 0 (0, 2)         | 0.0 (0, 1.8)    | 0.9 (0, 4.2)    | 0.05 (0, 2.1)   |
| <b>PPP-VAS, current mental pain: median (Q1,Q3)</b>   | 8.0 (6.6 , 9.1) | 8.0 (6.0 , 8.8)   | 7.0 (4.9 , 8.1) | 5.0 (1.9 , 7.1) | 7.0 (4.6 , 8.2) | 4.8 (2.2 , 7.0) | 7.0 (4.9 , 8.0) | 4.7 (2.0 , 7.0) | 6.8 (4.8 , 8.3) | 4.6 (2.0 , 7.0)  | 5.7 (2.3 , 8.0) | 4.1 (1.0 , 6.2) | 5 (2, 8)     | 3.7 (0.3 , 6.3) | 4.5 (2.0 , 8.0) | 3.0 (0.1 , 6.0) | 5.0 (2.0 , 6.9) | 3.6 (0.2 , 6.5)  | 3.0 (1.0 , 6.4)  | 2 (0, 5)        | 2.4 (0.7 , 6.2) | 1.5 (0.2 , 5.0) |
| <b>BHS: median (Q1,Q3)</b>                            | 16 (12, 17)     | 16.0 (13.2, 17.0) | -               | -               | -               | -               | -               | -               | 14 (9, 17)      | 12.0 (7.0, 16.2) | 14 (9, 17)      | 9.5 (5.0, 17.0) | 13 (8, 17)   | 9 (4, 15)       | 12 (6, 17)      | 9 (3, 15)       | 11 (7, 16)      | 10.0 (3.8, 16.0) | 10.0 (4.8, 13.0) | 6.5 (2.0, 14.5) | 7 (4, 15)       | 7 (2, 16)       |
| <b>IDS-C30: mean (SD)</b>                             | 37.7 (9.01)     | 38.6 (11.2)       | -               | -               | -               | -               | 32.0 (10.8)     | 25.5 (13.5)     | 27.6 (10.2)     | 21.6 (12.8)      | 25.6 (11.2)     | 19.0 (12.5)     | 24.2 (12.7)  | 17.4 (12.1)     | 23.8 (12.2)     | 16.9 (12.2)     | 23.4 (12.5)     | 18.0 (12.5)      | 19.2 (12.3)      | 16.8 (11.5)     | 16.8 (10.5)     | 16.0 (11.7)     |
| <b>YMRS: median (Q1,Q3)</b>                           | 2.0 (0.0 , 3.5) | 1 (0, 3)          | -               | -               | -               | -               | -               | -               | 1 (0, 2)        | 0.0 (0.0, 1.3)   | 1 (0, 2)        | 0 (0, 2)        | 0 (0, 2)     | 0 (0, 2)        | 0 (0, 2)        | 0 (0, 2)        | -               | -                | -                | -               | -               | -               |
| <b>BPRS: median (Q1,Q3)</b>                           | 38.7 (8.8)      | 37.6 (8.5)        | -               | -               | -               | -               | -               | -               | 33.5 (7.6)      | 29.6 (9.4)       | 32.0 (7.1)      | 27.6 (7.9)      | 29.6 (7.3)   | 26.8 (7.7)      | 30.6 (8.6)      | 27.1 (8.4)      | -               | -                | -                | -               | -               | -               |

|                           |                        |                        |                            |                            |                            |                            |                        |                        |                    |                    |                    |                    |                    |                    |                    |                    |                    |                |                |                |                |                |
|---------------------------|------------------------|------------------------|----------------------------|----------------------------|----------------------------|----------------------------|------------------------|------------------------|--------------------|--------------------|--------------------|--------------------|--------------------|--------------------|--------------------|--------------------|--------------------|----------------|----------------|----------------|----------------|----------------|
| <b>CGI: mean<br/>(SD)</b> | 5.6<br>5<br>(0.8<br>5) | 5.7<br>3<br>(0.7<br>1) | 5.<br>36<br>(0.<br>98<br>) | 4.<br>59<br>(1<br>.3<br>8) | 5.1<br>7<br>(1.<br>39<br>) | 4.<br>42<br>(1<br>.3<br>3) | 5.2<br>2<br>(1.1<br>3) | 4.3<br>6<br>(1.3<br>4) | 5.13<br>(1.1<br>1) | 4.26<br>(1.3<br>9) | 4.79<br>(1.2<br>7) | 4.14<br>(1.4<br>2) | 4.55<br>(1.4<br>2) | 3.81<br>(1.5<br>7) | 4.58<br>(1.3<br>1) | 3.70<br>(1.4<br>7) | 4.13<br>(1.4<br>5) | 3.58<br>(1.58) | 3.64<br>(1.54) | 3.52<br>(1.48) | 3.39<br>(1.44) | 3.41<br>(1.53) |
|---------------------------|------------------------|------------------------|----------------------------|----------------------------|----------------------------|----------------------------|------------------------|------------------------|--------------------|--------------------|--------------------|--------------------|--------------------|--------------------|--------------------|--------------------|--------------------|----------------|----------------|----------------|----------------|----------------|

**Footnotes:** SSI=Beck scale for suicidal ideation. CSSRS =Columbia severity suicide rating scale. PPP-VAS=Physical and psychological pain – visual analog scale. BHS: Beck hopelessness scale. IDS-C30=30-item inventory for depressive symptomatology, clinician-rated version. YMRS: Young Mania Rating Scale. BPRS: Brief Psychiatric Rating Scale. CGI: Clinical Global Impression.



## **Scales used in the protocol to measure suicidal ideation and suicidal behaviors**

### **Beck Scale for Suicidal Ideation (BSSI).**

The BSSI is a 21-item questionnaire aimed to identify the presence and severity of suicidal ideation (Beck et al. 1979; Beck, Steer & Ranieri 1988; Beck, Brown & Steer 1997). It can be used as a clinician-rated questionnaire at the end of an interview, or self-rated by the patient. Items are score 0 to 2, and only the first 19 first are included in the calculation of the total score (0 to 38). Items are: Wish to live, Wish to die, Reasons for living / dying, Desire to make active suicide attempt, Passive suicide desire, Time dimension: Duration of suicide ideation / wish, Time dimension: Frequency of suicide, Attitude toward ideation / wish, Control over suicidal action / acting-out wish, Deterrents to active attempts (e.g. family, religion, irreversibility), Reason for contemplated attempt, Method: Specificity / planning of contemplated attempt, Method: Availability / opportunity for contemplated attempt, Sense of “capability” to carry out attempt, Expectancy / anticipation of actual attempt, Actual preparation for contemplated attempt, Suicide note, Final acts in anticipation of death (e.g. insurance, will), Description / concealment of contemplated suicide.

Beck AT, Kovacs M, Weissman A. Assessment of suicidal intention: the Scale for Suicide Ideation. *J Consult Clin Psychol* 1979; **47**:343-352.

Beck AT, Steer RA, Ranieri WF. Scale for Suicide Ideation: psychometric properties of a self-report version. *J Clin Psychol* 1988; **44**:499-505.

Beck AT, Brown GK, Steer RA. Psychometric characteristics of the Scale for Suicide Ideation with psychiatric outpatients. *Behav Res Ther* 1997; **35**:1039-1046.

### **Columbia suicide severity rating scale (CSSRS)**

Developed by Posner et al. (2011) and translated into French, this scale prospectively measures the severity and intensity of suicidal ideation, the different types of suicidal behavior and the lethality of suicide attempts. The latest/lifetime version allows the practitioner to collect the history of suicidality and suicidal ideas throughout life and /or recent suicidal behavior. The scale encodes events via precise definitions. These definitions are adopted by the Centre for Disease Control and Prevention (CDC) and originate from the Columbia Classification Algorithm for Suicide Assessment (C-CASA). The C-SSRS scale is used to reduce costs and workload by providing a more accurate identification of patients at risk and the extent of treatment response. The scale is now commonly used for the evaluation of suicidal thoughts and behavior in the context of research and clinical practice in psychiatric and non-psychiatric areas.

Posner K, Brown GK, Stanley B et al. The Columbia-Suicide Severity Rating Scale: initial validity and internal consistency findings from three multisite studies with adolescents and adults. *Am J Psychiatry* 2011; **168**:1266-1277.
